# Supplementary material for: Application of Vine-Shoot Chips during Winemaking and Aging of Malbec and Bonarda Wines
Source: MDPI journal article supplement (doi:10.3390/beverages7030051), 2021-07-19
Supplement: s1 [file s1]

## Supplementary Materials

### Application of Vine-Shoot Chips during Winemaking and Aging of Malbec and Bonarda Wines

Martín Fanzone <sup>1,2,\*</sup>, Anibal Catania <sup>1</sup>, Mariela Assof <sup>1,2</sup>, Viviana Jofré <sup>1,2</sup>, Jorge Prieto <sup>1,2</sup>, Daniela Gil Quiroga <sup>2</sup>, Juan Lacognata Sottano <sup>2</sup>, and Santiago Sari <sup>1</sup>

<sup>1</sup> Estación Experimental Agropecuaria Mendoza, Instituto Nacional de Tecnología Agropecuaria (EEA Mendoza INTA), San Martín 3853, 5507 Mendoza, Argentina; catania.anibal@inta.gob.ar (A.C.); assof.mariela@inta.gob.ar (M.A.); jofre.viviana@inta.gob.ar (V.J.); prieto.jorge@inta.gob.ar (J.P.); sari.santiago@inta.gob.ar (S.S.)

<sup>2</sup> Centro de Estudios Vitivinícolas y Agroindustriales (CEVA), Universidad Juan Agustín Maza, Av. Acceso Este, Lateral Sur 2245, 5519 Mendoza, Argentina; gilquirogadaniela@gmail.com (D.G.Q.); juanilacog@gmail.com (J.L.S.)

\* Correspondence: fanzone.martin@inta.gob.ar; Tel.: +54-926-146-73011

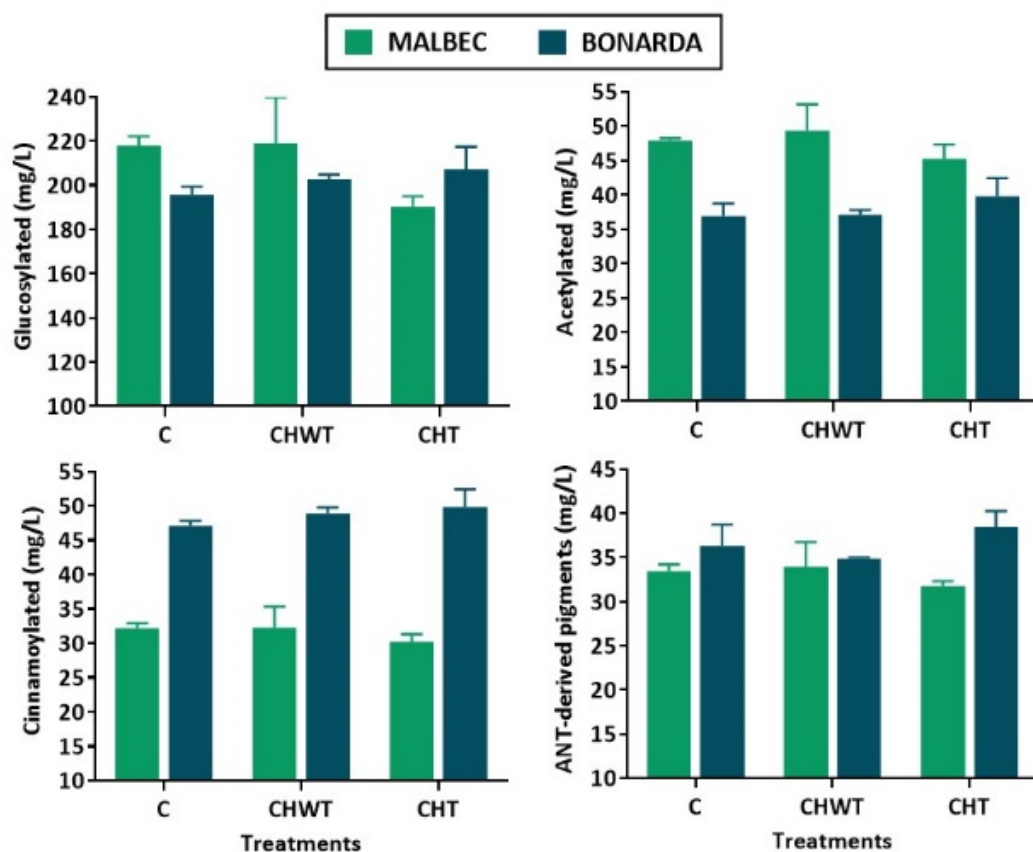

**Figure S1.** Anthocyanins and derived pigments of Malbec and Bonarda wines obtained applying different vine-shoot treatments during winemaking. C, control; CHWT, untoasted vine-shoot chips; CHT, toasted vine-shoot chips; ANT-derived pigments (pyranoanthocyanins + flavanol-anthocyanin adducts).

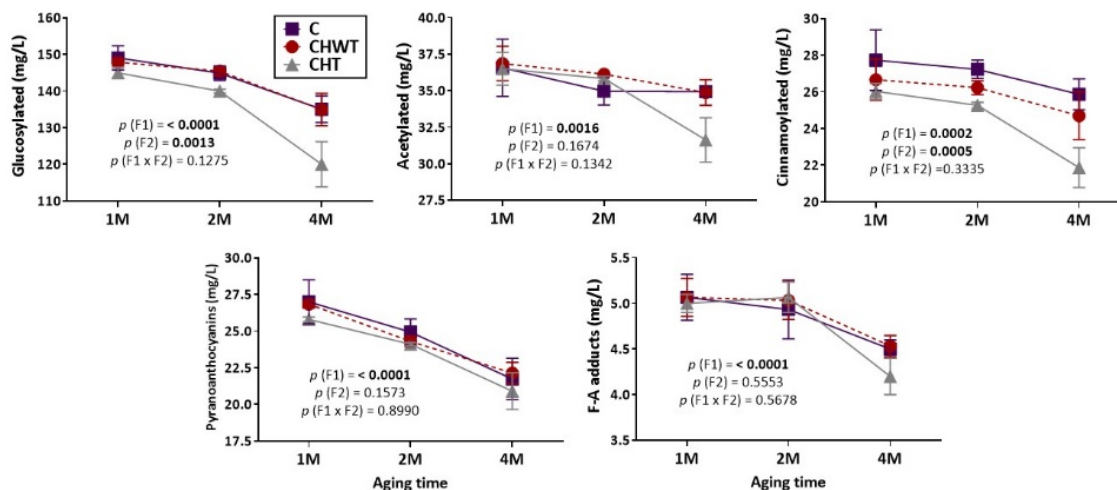

**Figure S2.** Anthocyanins and derived pigments of Malbec wines obtained applying different vine-shoot treatments during aging. Significant  $p$ -values by two-way ANOVA (Tukey HSD test,  $p < 0.05$ ) are shown in bold. F1, aging time; F2, vine-shoot treatments; C, control; CHWT, untoasted vine-shoot chips; CHT, toasted vine-shoot chips; 1M, 30 days; 2M, 60 days; 4M, 120 days; F-A, flavanol-anthocyanin adducts.

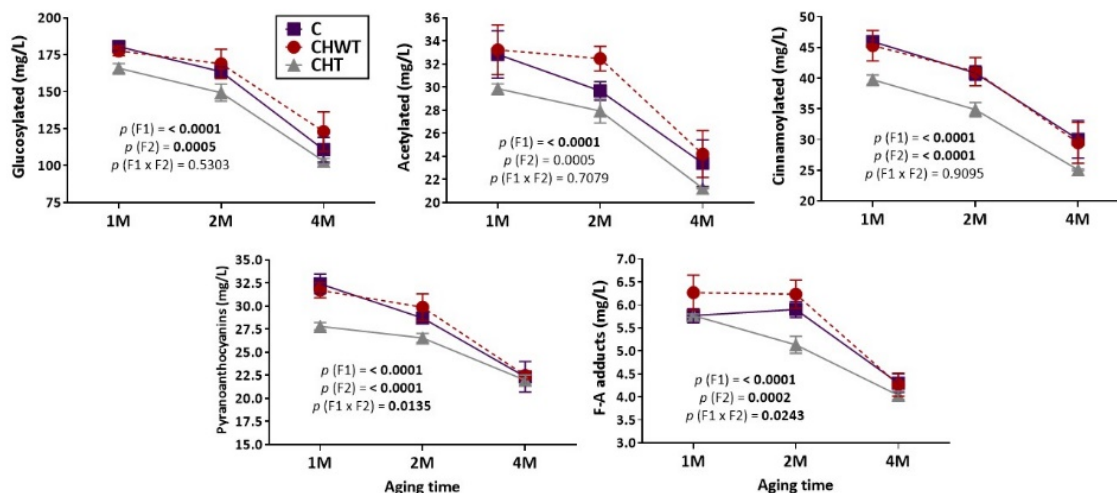

**Figure S3.** Anthocyanins and derived pigments of Bonarda wines obtained applying different vine-shoot treatments during aging. Significant  $p$ -values by two-way ANOVA (Tukey HSD test,  $p < 0.05$ ) are shown in bold. F1, aging time; F2, vine-shoot treatments; C, control; CHWT, untoasted vine-shoot chips; CHT, toasted vine-shoot chips; 1M, 30 days; 2M, 60 days; 4M, 120 days; F-A, flavanol-anthocyanin adducts.

**Table S1.** Concentration (mg/L) of individual anthocyanins of Malbec wines obtained applying vine-shoot chips during aging (Experiment B).

| Compound           | 1M             |                |                | 2M              |                 |                 | 4M             |                 |               | Two-way ANOVA     |                   |               |
|--------------------|----------------|----------------|----------------|-----------------|-----------------|-----------------|----------------|-----------------|---------------|-------------------|-------------------|---------------|
|                    | C              | CHWT           | CHT            | C               | CHWT            | CHT             | C              | CHWT            | CHT           | F1                | F2                | F1 × F2       |
| Dp-3-gl            | 4.17* ± 0.52   | 4.00 ± 0.12    | 4.16 ± 0.12    | 4.09 ± 0.08 ab  | 4.03 ± 0.10 a   | 4.34 ± 0.14 b   | 3.86 ± 0.18    | 3.92 ± 0.31     | 3.88 ± 0.22   | 0.0628            | 0.4625            | 0.6912        |
| Cy-3-gl            | 1.86 ± 0.35    | 2.18 ± 0.35    | 2.08 ± 0.35    | 1.68 ± 0.13     | 2.04 ± 0.30     | 2.00 ± 0.23     | 1.55 ± 0.08    | 1.56 ± 0.02     | 1.53 ± 0.20   | <b>0.0017</b>     | 0.1590            | 0.6962        |
| Pt-3-gl            | 8.79 ± 1.14    | 8.36 ± 0.42    | 8.20 ± 0.18    | 8.11 ± 0.46     | 8.42 ± 0.15     | 8.69 ± 0.56     | 8.16 ± 0.23    | 8.21 ± 0.49     | 7.86 ± 0.80   | 0.3428            | 0.9263            | 0.4725        |
| Pn-3-gl            | 7.61 ± 0.67    | 7.98 ± 1.49    | 7.50 ± 0.52    | 8.10 ± 0.37 b   | 7.16 ± 0.15 a   | 7.03 ± 0.24 a   | 5.91 ± 0.55    | 6.41 ± 0.89     | 5.60 ± 0.76   | <b>0.0002</b>     | 0.2921            | 0.4626        |
| Mv-3-gl            | 126.60 ± 0.93  | 125.37 ± 2.75  | 123.04 ± 2.42  | 122.87 ± 1.53 b | 123.76 ± 1.07 b | 117.90 ± 0.22 a | 115.53 ± 2.90  | 114.84 ± 4.17   | 101.10 ± 8.77 | <b>&lt;0.0001</b> | 0.0004            | 0.0693        |
| Dp-3-acgl          | 3.13 ± 0.15    | 3.26 ± 0.07    | 3.15 ± 0.16    | 2.65 ± 0.74     | 2.81 ± 0.27     | 2.65 ± 0.05     | 2.83 ± 0.03    | 2.83 ± 0.10     | 2.67 ± 0.21   | <b>0.0049</b>     | 0.5704            | 0.9751        |
| Cy-3-acgl          | 3.19 ± 0.24    | 3.18 ± 0.06    | 3.29 ± 0.19    | 3.16 ± 0.05     | 3.20 ± 0.22     | 3.15 ± 0.05     | 3.14 ± 0.23    | 2.90 ± 0.11     | 2.80 ± 0.22   | <b>0.0069</b>     | 0.5524            | 0.2403        |
| Pt-3-acgl          | 5.62 ± 0.37    | 5.63 ± 0.13    | 5.45 ± 0.73    | 4.98 ± 0.20 a   | 5.71 ± 0.30 b   | 5.69 ± 0.10 b   | 4.85 ± 0.19    | 5.10 ± 0.23     | 4.69 ± 0.34   | <b>0.0008</b>     | 0.1425            | 0.1558        |
| Pn-3-acgl          | 6.24 ± 0.47    | 6.34 ± 0.78    | 5.91 ± 0.41    | 5.51 ± 1.27     | 5.76 ± 0.38     | 4.43 ± 0.73     | 2.88 ± 0.72    | 2.22 ± 0.12     | 2.12 ± 0.38   | <b>&lt;0.0001</b> | 0.0679            | 0.4858        |
| Mv-3-acgl          | 18.38 ± 1.80   | 18.44 ± 1.83   | 18.69 ± 0.73   | 18.68 ± 1.49    | 18.64 ± 0.86    | 19.91 ± 0.95    | 21.26 ± 0.35   | 21.83 ± 0.86    | 19.36 ± 1.56  | <b>0.0029</b>     | 0.8652            | 0.1319        |
| Dp-3-cmgl          | 2.98 ± 0.70    | 3.33 ± 0.83    | 3.23 ± 0.54    | 2.93 ± 0.20 a   | 3.10 ± 0.23 ab  | 3.59 ± 0.27 b   | 3.19 ± 0.17    | 3.14 ± 0.04     | 2.93 ± 0.29   | 0.8361            | 0.5639            | 0.4162        |
| Mv-3-cfgl          | 2.04 ± 0.27    | 1.99 ± 0.17    | 1.88 ± 0.19    | 1.96 ± 0.24     | 1.81 ± 0.15     | 1.60 ± 0.08     | 1.62 ± 0.06 b  | 1.53 ± 0.08 ab  | 1.38 ± 0.06 a | <b>&lt;0.0001</b> | <b>0.0135</b>     | 0.8781        |
| Pt-3-cmgl          | 3.20 ± 0.08    | 3.13 ± 0.10    | 2.98 ± 0.12    | 3.26 ± 0.09     | 3.23 ± 0.15     | 3.08 ± 0.11     | 3.11 ± 0.08    | 2.99 ± 0.11     | 2.74 ± 0.21   | <b>0.0017</b>     | <b>0.0011</b>     | 0.7603        |
| Mv-3-cis-cmgl      | 2.37 ± 0.17    | 2.35 ± 0.16    | 2.47 ± 0.17    | 2.24 ± 0.08     | 2.34 ± 0.06     | 2.31 ± 0.02     | 2.36 ± 0.10    | 2.29 ± 0.16     | 2.20 ± 0.14   | 0.1520            | 0.9957            | 0.3517        |
| Pn-3-cmgl          | 3.57 ± 0.34    | 3.32 ± 0.20    | 3.30 ± 0.18    | 3.56 ± 0.10 b   | 3.20 ± 0.03 a   | 3.19 ± 0.04 a   | 3.30 ± 0.13    | 3.15 ± 0.21     | 2.91 ± 0.25   | <b>0.0164</b>     | <b>0.0036</b>     | 0.7882        |
| Mv-3-trans-cmgl    | 13.60 ± 0.46 b | 12.51 ± 0.12 a | 12.17 ± 0.04 a | 13.26 ± 0.43 c  | 12.54 ± 0.15 b  | 11.47 ± 0.03 a  | 12.30 ± 0.44 b | 11.63 ± 0.86 ab | 9.71 ± 0.96 a | <b>&lt;0.0001</b> | <b>&lt;0.0001</b> | 0.1378        |
| 10-H-pyrmv-3-acgl  | 2.39 ± 0.40    | 2.35 ± 0.44    | 2.31 ± 0.44    | 2.44 ± 0.05 b   | 2.04 ± 0.18 a   | 2.25 ± 0.11 ab  | 2.24 ± 0.25    | 2.23 ± 0.10     | 2.35 ± 0.15   | 0.7230            | 0.5113            | 0.6925        |
| 10-C-pyrpt-3-gl    | 7.91 ± 0.57    | 8.03 ± 0.12    | 7.54 ± 0.30    | 7.15 ± 0.30     | 6.99 ± 0.40     | 6.56 ± 0.18     | 5.71 ± 0.73    | 5.68 ± 0.31     | 4.95 ± 1.05   | <b>&lt;0.0001</b> | 0.0508            | 0.9597        |
| 10-C-pyrpn-3-gl    | 2.18 ± 0.06    | 2.14 ± 0.11    | 2.19 ± 0.05    | 2.30 ± 0.03 b   | 2.10 ± 0.02 a   | 2.09 ± 0.07 a   | 2.16 ± 0.03    | 2.19 ± 0.06     | 2.13 ± 0.14   | 0.9668            | 0.0713            | 0.0531        |
| 10-C-pyrmv-3-gl    | 5.40 ± 0.36    | 5.61 ± 0.43    | 5.20 ± 0.38    | 4.84 ± 0.18     | 4.87 ± 0.20     | 4.87 ± 0.10     | 4.11 ± 0.01    | 4.39 ± 0.17     | 4.03 ± 0.38   | <b>&lt;0.0001</b> | 0.1652            | 0.7371        |
| 10-C-pyrmv-3-acgl  | 4.00 ± 0.16    | 4.04 ± 0.13    | 3.83 ± 0.15    | 3.55 ± 0.48     | 3.74 ± 0.20     | 3.58 ± 0.17     | 2.89 ± 0.43    | 3.06 ± 0.06     | 2.92 ± 0.30   | <b>&lt;0.0001</b> | 0.3909            | 0.9635        |
| 10-HP-pyrmv-3-gl   | 1.75 ± 0.14    | 1.59 ± 0.02    | 1.59 ± 0.01    | 1.64 ± 0.03 b   | 1.56 ± 0.04 ab  | 1.54 ± 0.03 a   | 1.51 ± 0.08    | 1.51 ± 0.12     | 1.46 ± 0.11   | <b>0.0033</b>     | <b>0.0322</b>     | 0.5336        |
| 10-MHP-pyrmv-3-gl  | 1.19 ± 0.07    | 1.12 ± 0.02    | 1.13 ± 0.04    | 1.08 ± 0.03 a   | 1.07 ± 0.04 a   | 1.18 ± 0.02 b   | 1.20 ± 0.07    | 1.15 ± 0.08     | 1.17 ± 0.08   | 0.0919            | 0.1528            | 0.2115        |
| 10-HP-pyrmv-3-acgl | 1.25 ± 0.11    | 1.06 ± 0.06    | 1.09 ± 0.03    | 1.05 ± 0.02 a   | 1.05 ± 0.02 a   | 1.11 ± 0.01 b   | 1.03 ± 0.02    | 1.00 ± 0.03     | 0.99 ± 0.03   | <b>0.0001</b>     | <b>0.0084</b>     | <b>0.0040</b> |
| 10-HP-pyrmv-3-cmgl | 0.93 ± 0.04 ☉  | 0.93 ± 0.03    | 0.93 ± 0.01 ☉  | 0.88 ± 0.01 a   | 0.88 ± 0.02 a   | 0.92 ± 0.01 b   | 0.92 ± 0.01 b  | 0.90 ± 0.01 ab  | 0.89 ± 0.01 a | <b>0.0024</b>     | 0.6505            | 0.0695        |
| Mv-3-gl-Cat        | 1.66 ± 0.05 ☉  | 1.77 ± 0.16    | 1.77 ± 0.04 ☉  | 1.68 ± 0.10     | 1.91 ± 0.18     | 1.90 ± 0.17     | 1.79 ± 0.04    | 1.79 ± 0.11     | 1.70 ± 0.19 ☉ | 0.2589            | 0.1766            | 0.3664        |
| Mv-3-gl-ethyl-Cat  | 3.42 ± 0.31 ☉  | 3.30 ± 0.19    | 3.23 ± 0.20 ☉  | 3.27 ± 0.18     | 3.12 ± 0.10     | 3.15 ± 0.11     | 2.69 ± 0.09    | 2.72 ± 0.06     | 2.49 ± 0.14 ☉ | <b>&lt;0.0001</b> | 0.1455            | 0.7387        |

\* Mean ± SD (n = 3). Different letters in the same row for each aging time indicate significant differences among treatments (Tukey HSD test,  $p < 0.05$ ). Significant  $p$ -values are shown in bold. Aging time (F1): 1M, 30 days; 2M, 60 days; 4M, 120 days. Vine-shoot treatment (F2): C, control; CHWT, untoasted vine-shoot chips; CHT, toasted vine-shoot chips. Abbreviations: Dp, delphinidin; Cy, cyanidin; Pt, petunidin; Pn, peonidin; Mv, malvidin; 3-gl, 3-glucoside; 3-acgl, 3-(6"-acetyl)-glucoside; 3-cfgl, 3-(6"-caffeoyl)-glucoside; 3-cmgl, 3-(6"-p-coumaroyl)-glucoside; 10-H, vitisin B structures; 10-C, vitisin A structures; pypt, pyranopetunidin; pyrpn, pyranopeonidin; pyrmv, pyranomalvidin; 10-HP, p-hydroxyphenyl; 10-MHP, methoxy-hydroxyphenyl or guaiaacyl; Cat, catechin.

**Table S2.** Concentration (mg/L) of individual anthocyanins of Bonarda wines obtained applying vine-shoot chips during aging (Experiment B).

| Compound           | 1M               |                 |                 | 2M             |                |                | 4M              |                |                | Two-way ANOVA     |                   |               |
|--------------------|------------------|-----------------|-----------------|----------------|----------------|----------------|-----------------|----------------|----------------|-------------------|-------------------|---------------|
|                    | C                | CHWT            | CHT             | C              | CHWT           | CHT            | C               | CHWT           | CHT            | F1                | F2                | F1 x F2       |
| Dp-3-gl            | 15.43 * ± 1.03   | 14.52 ± 1.46    | 14.72 ± 0.66    | 15.79 ± 1.17 b | 15.25 ± 0.69 b | 12.44 ± 0.23 a | 9.69 ± 0.65     | 9.56 ± 0.31    | 8.64 ± 0.26    | <b>&lt;0.0001</b> | <b>0.0012</b>     | <b>0.0334</b> |
| Cy-3-gl            | 5.36 ± 0.48      | 4.78 ± 0.17     | 4.54 ± 0.39     | 4.75 ± 0.23    | 4.69 ± 0.28    | 4.38 ± 0.31    | 3.58 ± 0.26     | 3.86 ± 0.28    | 3.34 ± 0.03    | <b>&lt;0.0001</b> | <b>0.0079</b>     | 0.1902        |
| Pt-3-gl            | 23.32 ± 0.87     | 20.69 ± 2.02    | 20.90 ± 0.54    | 22.71 ± 1.54 b | 21.64 ± 0.15 b | 17.59 ± 1.03 a | 14.19 ± 0.73 ab | 14.44 ± 0.74 b | 12.68 ± 0.37 a | <b>&lt;0.0001</b> | <b>&lt;0.0001</b> | <b>0.0092</b> |
| Pn-3-gl            | 16.50 ± 1.12     | 15.62 ± 0.33    | 14.51 ± 0.78    | 14.75 ± 0.71   | 14.64 ± 0.72   | 12.92 ± 1.07   | 9.27 ± 0.93     | 9.92 ± 0.71    | 8.73 ± 0.10    | <b>&lt;0.0001</b> | <b>0.0015</b>     | 0.3974        |
| Mv-3-gl            | 119.96 ± 1.57 ab | 122.08 ± 5.32 b | 111.16 ± 3.98 a | 105.54 ± 0.83  | 112.63 ± 9.12  | 102.02 ± 7.90  | 73.99 ± 5.78    | 85.26 ± 11.49  | 69.65 ± 2.94   | <b>&lt;0.0001</b> | <b>0.0025</b>     | 0.7699        |
| Dp-3-acgl          | 3.52 ± 0.50      | 3.20 ± 0.72     | 3.44 ± 0.63     | 2.97 ± 0.14    | 3.20 ± 0.29    | 2.89 ± 0.05    | 2.32 ± 0.35     | 2.36 ± 0.14    | 2.30 ± 0.16    | <b>0.0001</b>     | 0.9449            | 0.7413        |
| Cy-3-acgl          | 3.70 ± 0.35      | 3.57 ± 0.22     | 3.31 ± 0.37     | 3.71 ± 0.25    | 3.85 ± 0.13    | 3.61 ± 0.01    | 3.21 ± 0.17     | 3.10 ± 0.08    | 2.95 ± 0.18    | <b>&lt;0.0001</b> | 0.0645            | 0.7661        |
| Pt-3-acgl          | 4.37 ± 0.68      | 4.63 ± 0.32     | 4.10 ± 0.08     | 4.76 ± 0.34 ab | 5.19 ± 0.03 b  | 4.43 ± 0.18 a  | 3.97 ± 0.24     | 3.73 ± 0.23    | 3.65 ± 0.07    | <b>&lt;0.0001</b> | <b>0.0161</b>     | 0.3133        |
| Pn-3-acgl          | 6.52 ± 1.17      | 6.20 ± 1.22     | 5.25 ± 0.55     | 5.13 ± 0.81    | 5.15 ± 0.83    | 4.31 ± 0.79    | 2.90 ± 0.40     | 2.76 ± 0.31    | 2.26 ± 0.05    | <b>&lt;0.0001</b> | <b>0.0490</b>     | 0.9574        |
| Mv-3-acgl          | 14.74 ± 2.02     | 15.63 ± 1.90    | 13.75 ± 1.15    | 13.10 ± 0.61 a | 15.10 ± 0.13 b | 12.69 ± 0.84 a | 10.96 ± 0.98    | 12.23 ± 1.81   | 10.06 ± 0.51   | <b>&lt;0.0001</b> | <b>0.0070</b>     | 0.9598        |
| Dp-3-cmgl          | 3.72 ± 0.54      | 3.78 ± 0.66     | 3.24 ± 0.34     | 3.55 ± 0.44    | 3.79 ± 0.58    | 2.79 ± 0.24    | 2.88 ± 0.48     | 2.66 ± 0.02    | 2.54 ± 0.13    | <b>0.0010</b>     | <b>0.0233</b>     | 0.5460        |
| Mv-3-cfgl          | 3.55 ± 0.06      | 3.41 ± 0.09     | 3.48 ± 0.08     | 3.48 ± 0.20    | 3.24 ± 0.26    | 3.00 ± 0.14    | 2.94 ± 0.36     | 2.78 ± 0.11    | 2.71 ± 0.17    | <b>&lt;0.0001</b> | <b>0.0274</b>     | 0.4458        |
| Pt-3-cmgl          | 5.92 ± 0.60      | 6.03 ± 0.31     | 5.48 ± 0.13     | 5.27 ± 0.62    | 5.37 ± 0.58    | 4.47 ± 0.32    | 3.69 ± 0.27     | 3.60 ± 0.32    | 3.20 ± 0.04    | <b>&lt;0.0001</b> | <b>0.0074</b>     | 0.8339        |
| Mv-3-cis-cmgl      | 3.61 ± 0.10      | 3.55 ± 0.24     | 3.28 ± 0.15     | 3.20 ± 0.07 b  | 3.15 ± 0.04 b  | 2.79 ± 0.02 a  | 2.59 ± 0.22     | 2.56 ± 0.20    | 2.36 ± 0.04    | <b>&lt;0.0001</b> | <b>0.0003</b>     | 0.8582        |
| Pn-3-cmgl          | 5.41 ± 0.27 b    | 5.15 ± 0.28 ab  | 4.65 ± 0.33 a   | 4.95 ± 0.30 b  | 4.84 ± 0.25 b  | 4.20 ± 0.19 a  | 3.76 ± 0.40     | 3.57 ± 0.31    | 3.16 ± 0.05    | <b>&lt;0.0001</b> | <b>0.0001</b>     | 0.9558        |
| Mv-3-trans-cmgl    | 23.75 ± 0.35 b   | 23.36 ± 1.73 b  | 19.64 ± 0.68 a  | 20.42 ± 0.42   | 20.66 ± 2.08   | 17.60 ± 1.44   | 14.21 ± 1.39    | 14.32 ± 2.38   | 11.09 ± 0.32   | <b>&lt;0.0001</b> | <b>0.0001</b>     | 0.9487        |
| 10-H-pyrmv-3-acgl  | 3.17 ± 0.58      | 2.95 ± 0.42     | 2.73 ± 0.36     | 3.14 ± 0.66    | 3.75 ± 0.38    | 3.02 ± 0.31    | 3.00 ± 0.33     | 2.90 ± 0.19    | 2.86 ± 0.12    | 0.1129            | 0.2350            | 0.3844        |
| 10-C-pyrpt-3-gl    | 9.42 ± 1.35      | 9.89 ± 1.34     | 6.86 ± 1.15     | 6.74 ± 0.26    | 7.94 ± 1.14    | 6.70 ± 1.28    | 5.02 ± 0.54     | 5.54 ± 0.81    | 4.84 ± 0.38    | <b>&lt;0.0001</b> | <b>0.0090</b>     | 0.1689        |
| 10-C-pyrpn-3-gl    | 3.02 ± 0.22      | 2.89 ± 0.20     | 2.91 ± 0.03     | 2.97 ± 0.04 b  | 2.86 ± 0.12 ab | 2.73 ± 0.08 a  | 2.25 ± 0.14     | 2.20 ± 0.09    | 2.26 ± 0.04    | <b>&lt;0.0001</b> | 0.1326            | 0.5294        |
| 10-C-pyrmv-3-gl    | 7.06 ± 1.01      | 6.72 ± 0.65     | 6.43 ± 0.84     | 6.45 ± 0.23 b  | 5.65 ± 0.32 a  | 5.34 ± 0.27 a  | 4.09 ± 0.34     | 4.26 ± 0.26    | 4.30 ± 0.41    | <b>&lt;0.0001</b> | 0.1702            | 0.3464        |
| 10-C-pyrmv-3-acgl  | 4.71 ± 0.41      | 4.44 ± 0.31     | 4.10 ± 0.19     | 4.80 ± 0.22 b  | 4.73 ± 0.36 b  | 4.08 ± 0.11 a  | 3.29 ± 0.19     | 3.23 ± 0.15    | 3.38 ± 0.19    | <b>&lt;0.0001</b> | <b>0.0093</b>     | 0.0556        |
| 10-HP-pyrmv-3-gl   | 1.61 ± 0.04      | 1.56 ± 0.08     | 1.51 ± 0.04     | 1.54 ± 0.10    | 1.60 ± 0.11    | 1.54 ± 0.02    | 1.40 ± 0.16     | 1.31 ± 0.05    | 1.36 ± 0.09    | <b>0.0001</b>     | <b>0.4917</b>     | 0.5366        |
| 10-MHP-pyrmv-3-gl  | 1.26 ± 0.02      | 1.17 ± 0.05     | 1.17 ± 0.10     | 1.15 ± 0.02 a  | 1.27 ± 0.03 b  | 1.16 ± 0.03 a  | 1.26 ± 0.14     | 1.15 ± 0.06    | 1.13 ± 0.08    | 0.8016            | 0.1333            | 0.0680        |
| 10-HP-pyrmv-3-acgl | 1.20 ± 0.03      | 1.14 ± 0.03     | 1.15 ± 0.10     | 1.04 ± 0.02 a  | 1.13 ± 0.02 b  | 1.06 ± 0.02 a  | 1.09 ± 0.08     | 0.99 ± 0.04    | 0.97 ± 0.03    | <b>&lt;0.0001</b> | 0.0924            | <b>0.0195</b> |
| 10-HP-pyrmv-3-cmgl | 0.94 ± 0.02      | 0.93 ± 0.02     | 0.93 ± 0.04     | 0.89 ± 0.02 a  | 0.95 ± 0.01 b  | 0.91 ± 0.01 a  | 0.91 ± 0.03     | 0.90 ± 0.01    | 0.88 ± 0.01    | <b>0.0035</b>     | 0.1381            | <b>0.0250</b> |
| Mv-3-gl-Cat        | 2.34 ± 0.07 a    | 2.79 ± 0.05 b   | 2.51 ± 0.09 a   | 2.38 ± 0.32 b  | 2.90 ± 0.01 c  | 1.66 ± 0.10 a  | 1.78 ± 0.07     | 1.89 ± 0.27    | 1.60 ± 0.11 ☉  | <b>&lt;0.0001</b> | <b>&lt;0.0001</b> | <b>0.0001</b> |
| Mv-3-gl-ethyl-Cat  | 3.44 ± 0.12      | 3.44 ± 0.31     | 3.25 ± 0.08     | 3.52 ± 0.15    | 3.34 ± 0.29    | 3.48 ± 0.23    | 2.52 ± 0.16     | 2.41 ± 0.07    | 2.43 ± 0.10 ☉  | <b>&lt;0.0001</b> | 0.4234            | 0.6661        |

\* Mean ± SD (n = 3). Different letters in the same row for each aging time indicate significant differences among treatments (Tukey HSD test,  $p < 0.05$ ). Significant  $p$ -values are shown in bold. Aging time (F1): 1M, 30 days; 2M, 60 days; 4M, 120 days. Vine-shoot treatment (F2): C, control; CHWT, untoasted vine-shoot chips; CHT, toasted vine-shoot chips. Abbreviations: Dp, delphinidin; Cy, cyanidin; Pt, petunidin; Pn, peonidin; Mv, malvidin; 3-gl, 3-glucoside; 3-acgl, 3-(6"-acetyl)-glucoside; 3-cfgl, 3-(6"-caffeoyl)-glucoside; 3-cmgl, 3-(6"-p-coumaroyl)-glucoside; 10-H, vitisin B structures; 10-C, vitisin A structures; pypt, pyranopetunidin; pyrpn, pyranopeonidin; pyrmv, pyranomalvidin; 10-HP, p-hydroxyphenyl; 10-MHP, methoxy-hydroxyphenyl or guaiacyl; Cat, catechin.

**Table S3.** Relative Contributions (%) of top 20 Malbec descriptors to the first and second MFA axes.

| Malbec 1M             |       |                         |       |
|-----------------------|-------|-------------------------|-------|
| Descriptor            | Dim.1 | Descriptor              | Dim.2 |
| Wood_J6               | 6.570 | Astringency_J6          | 9.084 |
| Fruity_J6             | 5.841 | Herbaceous_J6           | 8.400 |
| Coffee_J5             | 5.135 | Astringency_J5          | 6.897 |
| Wood_J5               | 4.989 | Herbaceous_J5           | 6.378 |
| Fruity_J5             | 4.435 | Wood_J4                 | 5.325 |
| Coffee_J2             | 3.713 | Astringency_J4          | 5.325 |
| Fullness_J4           | 3.655 | Bitter_J4               | 5.325 |
| Color.intensity_J2    | 3.528 | Fruity_J2               | 4.704 |
| Bitter_J2             | 3.502 | Bitter_J3               | 3.238 |
| Toasted_J4            | 3.291 | Fruity_J7               | 3.047 |
| Jam_J4                | 3.291 | Aromatic.intensity_J7.1 | 3.047 |
| Astringency_J3        | 3.079 | Fullness_J7             | 3.047 |
| Aromatic.intensity_J4 | 3.016 | Color.intensity_J7      | 2.751 |
| Herbaceous_J2         | 2.908 | Astringency_J1          | 2.650 |
| Herbaceous_J3         | 2.760 | Color.intensity_J1      | 2.529 |
| Color.intensity_J3    | 2.721 | Acidity_J7.1            | 2.386 |
| Aromatic.intensity_J2 | 2.664 | Herbaceous_J1           | 2.161 |
| Fruity_J3             | 2.556 | Color.intensity_J3      | 2.147 |
| Acidity_J7            | 2.405 | Fruity_J6               | 1.696 |
| Fruity_J7.1           | 2.381 | Aromatic.intensity_J4   | 1.511 |
| Malbec 2M             |       |                         |       |
| Descriptor            | Dim.1 | Descriptor              | Dim.2 |
| Floral_J3             | 5.049 | Fruity_J3               | 5.560 |
| Toasted_J3            | 4.935 | Fullness_J5             | 5.421 |
| Astringency_J3        | 4.766 | Wood_J2                 | 5.325 |
| Dark.Fruit_J5         | 3.966 | Astringency_J2          | 5.325 |
| Rubber_J2             | 3.764 | Bitter_J3               | 4.859 |
| Color.intensity_J5    | 3.198 | Smoke_J2                | 4.736 |
| Astringency_J5        | 3.198 | Bitter_J4               | 4.018 |
| Spicy_J2              | 3.141 | Color.intensity_J1      | 3.985 |
| Fruity_J2             | 3.141 | Fullness_J4             | 3.934 |
| Wood_J1               | 2.916 | Aromatic.intensity_J4   | 3.780 |
| Fruity_J1             | 2.835 | Coffee_J5               | 3.772 |
| Aromatic.intensity_J1 | 2.835 | Toasted_J4              | 3.240 |
| Coffee_J1             | 2.835 | Chocolate_J4            | 3.240 |
| Aromatic.intensity_J5 | 2.760 | Fruity_J6               | 3.000 |
| Smoke_J5              | 2.760 | Fruity_J4               | 2.796 |
| Spicy_J5              | 2.760 | Color.intensity_J2      | 2.630 |
| Toasted_J6            | 2.723 | Color.intensity_J6      | 2.589 |
| Spicy_J6              | 2.723 | Fullness_J1             | 2.535 |
| Coffee_J6             | 2.723 | Astringency_J1          | 2.535 |
| Astringency_J6        | 2.723 | Bitter_J1               | 2.535 |
| Malbec 4M             |       |                         |       |
| Descriptor            | Dim.1 | Descriptor              | Dim.2 |
| Spicy_J1              | 3.363 | Fullness_J2             | 5.631 |
| Astringency_J1        | 3.322 | Wood_J2                 | 5.059 |
| Aromatic.intensity_J2 | 3.217 | Bitter_J2               | 5.059 |
| Wood_J1               | 2.985 | Color.intensity_J2      | 4.885 |
| Fruity_J1             | 2.985 | Bitter_J1               | 3.213 |
| Spicy_J2              | 2.202 | Color.intensity_J3      | 3.110 |
| Spicy_J3              | 2.143 | Astringency_J3          | 3.110 |
| Fruity_J3             | 2.125 | Spicy_J2                | 2.319 |
| Aromatic.intensity_J3 | 1.977 | Fullness_J3             | 2.128 |
| Wood_J3               | 1.977 | Aromatic.intensity_J2   | 0.723 |
| Fruity_J3.1           | 1.977 | Fruity_J1               | 0.671 |
| Bitter_J3             | 1.977 | Wood_J1                 | 0.671 |
| Bitter_J1             | 1.368 | Fruity_J3.1             | 0.444 |
| Fullness_J3           | 0.906 | Aromatic.intensity_J3   | 0.444 |
| Color.intensity_J2    | 0.570 | Wood_J3                 | 0.444 |
| Wood_J2               | 0.460 | Bitter_J3               | 0.444 |
| Bitter_J2             | 0.460 | Fruity_J3               | 0.211 |
| Color.intensity_J3    | 0.282 | Spicy_J3                | 0.183 |
| Astringency_J3        | 0.282 | Astringency_J1          | 0.140 |
| Fullness_J2           | 0.096 | Spicy_J1                | 0.075 |

**Table S4.** Relative Contributions (%) of top 20 Bonarda descriptors to the first and second MFA axes.

| Bonarda 1M            |       |                       |        |
|-----------------------|-------|-----------------------|--------|
| Descriptor            | Dim.1 | Descriptor            | Dim.2  |
| Color.intensity_J7    | 7.019 | Color.intensity_J3    | 7.215  |
| Jam_J3                | 5.304 | Color.intensity_J4    | 7.215  |
| Jam_J4                | 5.304 | Astringency_J7        | 6.711  |
| wood_J2               | 4.704 | Color.intensity_J2    | 5.385  |
| Wood_J3               | 4.562 | Fruity_J7             | 5.258  |
| wood_J4               | 4.562 | Fruity_J2             | 5.032  |
| Wood_J1               | 4.540 | Astringency_J5        | 4.690  |
| Color.intensity_J1    | 4.520 | Fullness_J5           | 4.690  |
| Fruity_J5             | 4.404 | Bitter_J7             | 3.994  |
| Bitter_J7             | 3.773 | Astringency_J3        | 3.855  |
| Aromatic.intensity_J2 | 3.691 | Astringency_J4        | 3.855  |
| Astringency_J3        | 3.641 | Chocolate_J5          | 3.848  |
| Astringency_J4        | 3.641 | Astringency_J2        | 3.683  |
| Fruity_J1             | 3.322 | Wood_J3               | 2.873  |
| Fruity_J7             | 2.588 | wood_J4               | 2.873  |
| Fruity_J8             | 2.470 | Color.intensity_J8    | 2.631  |
| Wood_J8               | 2.470 | Aromatic.intensity_J8 | 2.631  |
| Astringency_J8        | 2.470 | Toasted_J8            | 2.631  |
| Fullness_J8           | 2.470 | Bitter_J8             | 2.631  |
| Astringency_J1        | 2.262 | Astringency_J1        | 2.434  |
| Bonarda 2M            |       |                       |        |
| Descriptor            | Dim.1 | Descriptor            | Dim.2  |
| Smoke_J2              | 7.194 | chocolate_J2          | 11.936 |
| Astringency_J5        | 3.789 | Dark.Fruit_J2         | 7.268  |
| Floral_J5             | 3.736 | Bitter_J5             | 5.697  |
| Fruity_J3             | 3.615 | Coffee_J3             | 4.331  |
| Dark.Fruit_J2         | 3.567 | Astringency_J6        | 3.995  |
| Jam_J3                | 3.458 | Bitter_J6             | 3.995  |
| Toasted_J5            | 2.738 | Rubber_J6             | 3.995  |
| Toasted_J4            | 2.719 | Fullness_J6           | 3.782  |
| Spicy_J4              | 2.719 | Bitter_J1             | 3.360  |
| Chocolate_J4          | 2.719 | Color.intensity_J3    | 3.307  |
| Bitter_J4             | 2.719 | Aromatic.Intensity_J3 | 3.307  |
| Astringency_J4        | 2.719 | Astringency_J3        | 3.307  |
| Bitter_J3             | 2.648 | Color.intensity_J7    | 2.974  |
| Spicy_J6              | 2.480 | Color.intensity_J5    | 2.825  |
| Fruity_J5             | 2.397 | Color.Intensity_J1    | 2.679  |
| Coffee_J6             | 2.279 | Coffee_J7             | 2.417  |
| Wood_J6.1             | 2.279 | Fruity_J5             | 2.316  |
| Jam_J6                | 2.233 | Fruity_J4             | 2.237  |
| Wood_J1               | 2.139 | Rubber_J1             | 2.196  |
| Fruity_J1             | 2.139 | Astringency_J1        | 2.046  |
| Bonarda 4M            |       |                       |        |
| Descriptor            | Dim.1 | Descriptor            | Dim.2  |
| Dark.fruit_J7         | 4.936 | Aromatic.intensity_J1 | 8.357  |
| Wood_J7               | 4.868 | Astringency_J1        | 7.059  |
| Astringency_J7        | 4.654 | Sweet_J3              | 5.966  |
| Toasted_J1            | 3.819 | Astringency_J6        | 5.584  |
| Wood_J1               | 3.288 | Color.intensity_J4    | 4.817  |
| Floral_J5             | 3.132 | Spicy_J4              | 4.817  |
| Toasted_J5            | 3.074 | Fruity_J1             | 4.594  |
| Bitter_J5             | 3.074 | Wood_J4               | 3.997  |
| Smoke_J3              | 3.069 | Spicy                 | 3.332  |
| Dark.fruit_J3         | 3.012 | Astringency_J8        | 3.332  |
| Bitter_J3             | 3.012 | Aromatic.intensity_J6 | 3.074  |
| Dark.fruit_J6         | 2.794 | Fruity_J4             | 2.648  |
| Color.intensity_J6    | 2.742 | Bitter_J4             | 2.648  |
| Astringency_J5        | 2.599 | Fullness_J4           | 2.648  |
| Fruity_J5             | 2.500 | Jam_J4                | 1.888  |
| Wood_J3               | 2.450 | Wood_J1               | 1.817  |
| Wood_J6               | 2.442 | Fruity_J5             | 1.776  |
| Astringency_J3        | 2.440 | Astringency_J3        | 1.760  |
| Aroma.intensity_J4    | 2.359 | Wood_J3               | 1.740  |
| Aromatic.intensity_J2 | 2.281 | Fruity_J8             | 1.707  |
